# Supplementary material for: Ca2+-dependent protein acyltransferase DHHC21 controls activation of CD4+ T cells
Source: Oxford University Press journal article supplement (doi:10.1242/jcs.258186), 2021-04-28
Supplement: jcs258186supp.pdf [file jcs258186supp.pdf]

**Fig. S1**

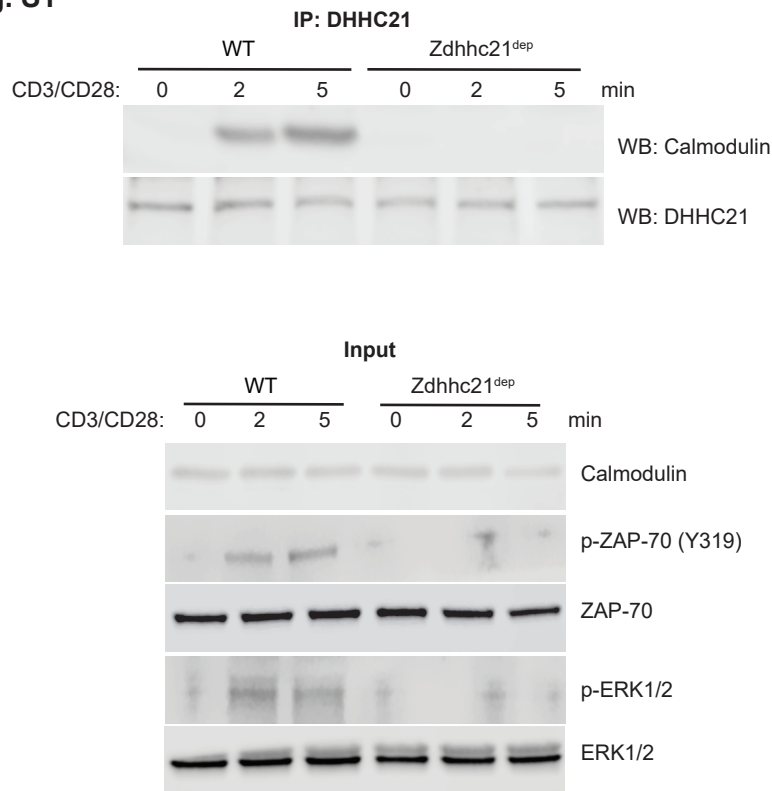

**Fig. S1:TCR-dependent co-immunoprecipitation of DHHC21 and calmodulin.** CD4<sup>+</sup> T cells from WT or Zdhhc<sup>dep</sup> mice were stimulated for indicated times with anti-CD3/CD28 antibody to evoke calcium release. DHHC21 was immunoprecipitated from the cell lysates and binding of calmodulin was detected by immunoblotting. Total lysates (20% load) are depicted as input. Phosphorylated ZAP-70 and ERK1/2 are shown to confirm CD4<sup>+</sup> T cells' responses to TCR-stimulation.
